# Supplementary material for: Effect of humic acid on phenanthrene removal by constructed wetlands using birnessite as a substrate
Source: Royal Society of Chemistry journal article supplement (doi:10.1039/d1ra06927f), 2022-01-01
Supplement: d1ra06927f1.pdf [file d1ra06927f1.pdf]

# Supplementary Material

## Effect of humic acid on phenanthrene removal by constructed wetlands using birnessite as substrates

Xiaotong Shen<sup>a</sup>, Jian Zhang<sup>b, c\*</sup>, Huijun Xie<sup>d</sup>, Shuang Liang<sup>c</sup>, Huu Hao Ngo<sup>e</sup>, Wenshan  
Guo<sup>e</sup>

**a** Medical Science and Technology Innovation Center, Shandong First Medical  
University & Shandong Academy of Medical Sciences, Jinan, Shandong 250117, China.

**b** College of Safety and Environmental Engineering, Shandong University of Science  
and Technology, Qingdao 266590, China

**c** Shandong Key Laboratory of Water Pollution Control and Resource Reuse, School of  
Environmental Science & Engineering, Shandong University, Qingdao 266237, China

**d** Environment Research Institute, Shandong University, Qingdao 266237, China

**e** School of Civil and Environmental Engineering, University of Technology Sydney,  
Broadway, NSW 2007, Australia

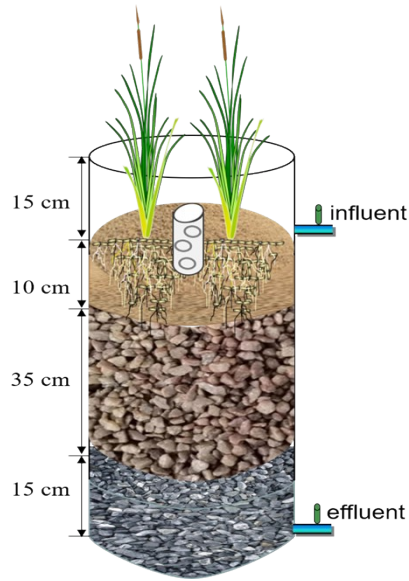

**Figure S1.** The schematic diagram of constructed wetland.

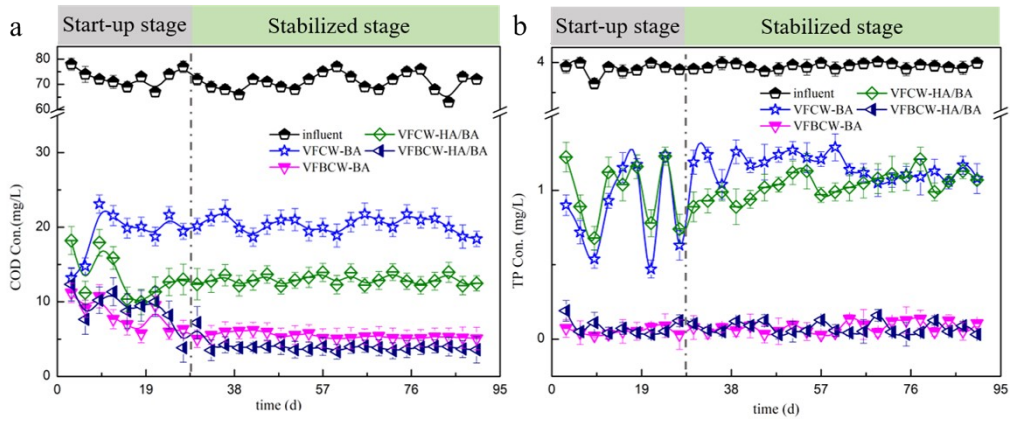

**Figure S2.** Overall treatment performance of COD (a) and TP (b) in each microcosm.

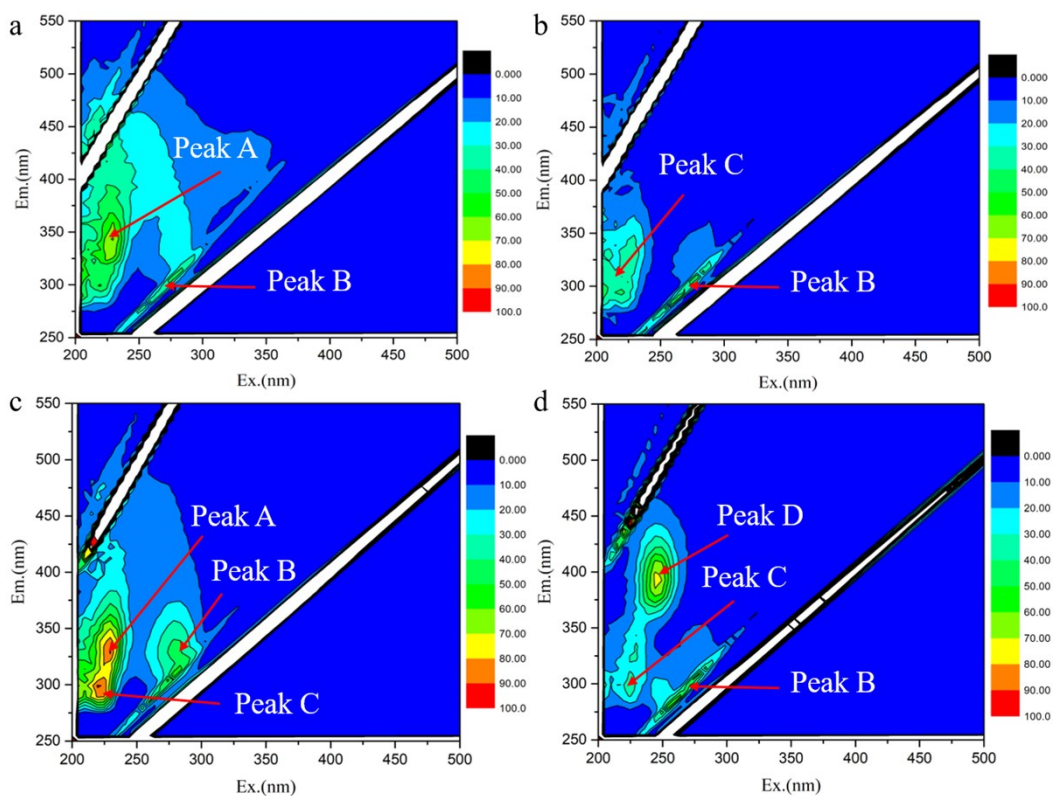

**Figure S3.** EEM spectra of DOM in different CW units: (a) VFCW-BA; (b) VFBCW-BA; (c) VFCW-HA/BA; (d) VFBCW-HA/BA. Peak A, B, C and D separately represent fluorescence peak of DOM.

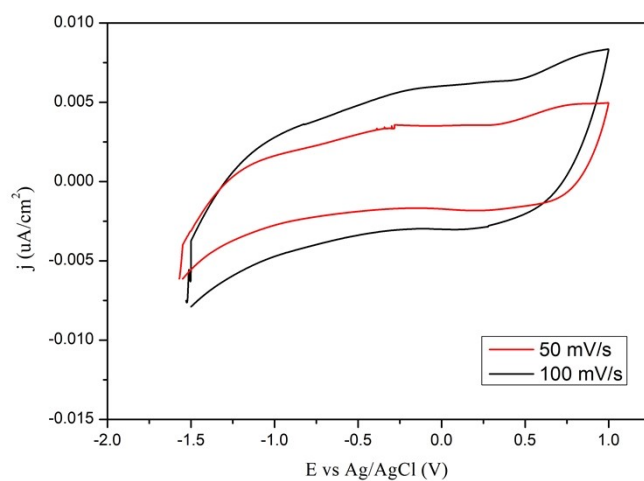

**Figure S4.** CV curves of HA modified BA on glassy carbon at a scan rate of 50  $\text{mV s}^{-1}$  and 100  $\text{mV s}^{-1}$ .

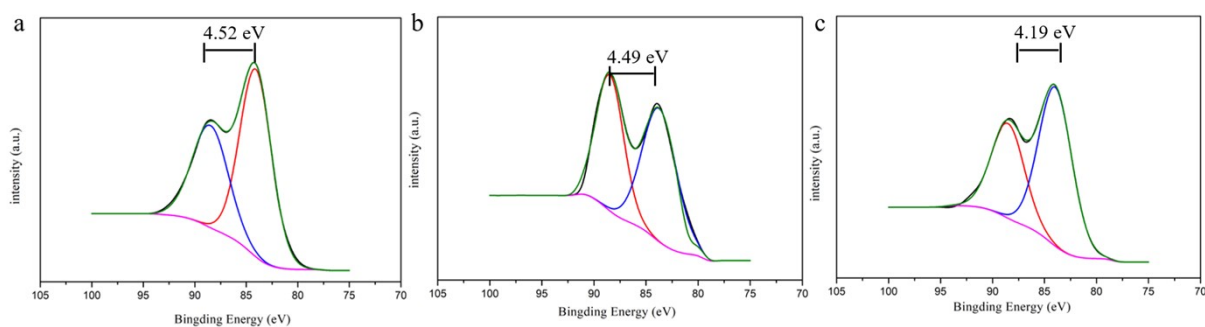

**Figure S5.** The XPS spectra of Mn3s for birnessite before the experiment (a) and birnessite in different operated CW units: VFBCW-BA (b) and VFBCW-HA/BA (c).

**Table S1.** EEMs locations, representative EEMs, and fluorescence compounds in CWs.

| Peaks                  | A                                 | B                                          | C                                 | D                        |
|------------------------|-----------------------------------|--------------------------------------------|-----------------------------------|--------------------------|
| EEMs location          | Ex: 229 nm<br>Em: 343 (333)<br>nm | Ex: 278 (224)<br>nm<br>Em: 309 (313)<br>nm | Ex: 220 (224)<br>nm<br>Em: 300 nm | Ex: 250 nm<br>Em: 400 nm |
| Fluorescence compounds | Tryptophan-like                   | Tyrosine-like                              | Tyrosine-like                     | UVC Humic-like           |

**Table S2.** The main absorbance bands in FTIR spectra and their assignments.

| Bands and peaks (cm <sup>-1</sup> ) | Assignments                                                                               |
|-------------------------------------|-------------------------------------------------------------------------------------------|
| 3400-3200                           | H-bonded OH groups of alcohols, phenols and organic acids, as well as H-bonded N-H groups |
| 2930-2920                           | C-H stretching of alkyl structures                                                        |
| 1660-1600                           | Aromatic and olefinic C=C, C=O in carboxyl; amide (I), ketone and quinone groups          |
| 1550                                | Amides II, aromatic C=C                                                                   |
| 1260-1200                           | Amide III or aromatic ethers C-O-C                                                        |
| 1070-1030                           | -C-O-C of carbohydrates, aromatic ethers, Si-O-C groupments                               |

**Table S3.** Relative composition ratios of Mn(II), Mn(III), and Mn(IV) and multiplet split of Mn 3s region (MS) and the average oxidation state of Mn oxides (Mn AOS) in birnessite before the experiment (pristine) and different operated CW units.

| Sample      | %Mn(IV) | %Mn(III) | %Mn(II) | MS   | Mn AOS |
|-------------|---------|----------|---------|------|--------|
| pristine    | 36.67   | 0        | 63.33   | 4.52 | 3.84   |
| VFBCW-BA    | 36.11   | 19.28    | 44.62   | 4.49 | 3.88   |
| VFBCW-HA/BA | 34.74   | 25.01    | 40.25   | 4.19 | 4.22   |

**Table S4.** Comparison of diversity and richness estimators of different depths of substrates.

| Sample      | OTU   | Microbial species | Shannon | Simpson | Chao1   | ACE     | Coverage |
|-------------|-------|-------------------|---------|---------|---------|---------|----------|
| VFBCW-BA    | 40235 | 3104              | 7.86    | 0.98    | 2049.56 | 1814.73 | 0.99     |
| VFCW-HA/BA  | 66254 | 2953              | 7.5     | 0.97    | 1903.82 | 1895.18 | 0.99     |
| VFBCW-HA/BA | 64358 | 3162              | 7.53    | 0.98    | 1832.53 | 1810.65 | 0.99     |
